# Supplementary material for: An Innovative Three-Stage Model for Prenatal Genetic Disorder Detection Based on Region-of-Interest in Fetal Ultrasound
Source: MDPI journal article supplement (doi:10.3390/bioengineering10070873), 2023-07-23
Supplement: s1 [file s1]

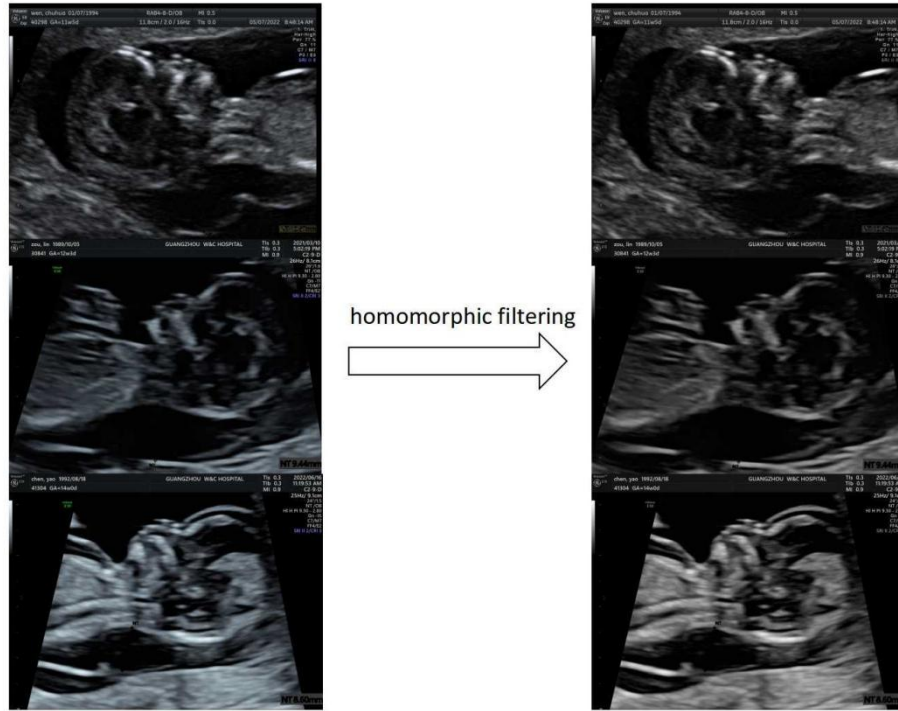

**Supplementary Material S1.** Example of homomorphic filtering results.

|              | NA+N<br>B                                                                                | Max+man<br>d | Chin | Head2                                                                                  | Head1 | NT |
|--------------|------------------------------------------------------------------------------------------|--------------|------|----------------------------------------------------------------------------------------|-------|----|
| Model        | CNN A                                                                                    |              |      | CNN B                                                                                  |       |    |
| Conv1        | 7×7                                                                                      |              |      | 3×3                                                                                    |       |    |
| Conv2_x      | $\begin{bmatrix} 3 \times 3,64 \\ 3 \times 3,64 \\ \text{CBAM} \end{bmatrix} \times 3$   |              |      | $\begin{bmatrix} 3 \times 3,16 \\ 3 \times 3,16 \\ \text{CBAM} \end{bmatrix} \times 1$ |       |    |
| Conv3_x      | $\begin{bmatrix} 3 \times 3,128 \\ 3 \times 3,128 \\ \text{CBAM} \end{bmatrix} \times 3$ |              |      | $\begin{bmatrix} 3 \times 3,32 \\ 3 \times 3,32 \\ \text{CBAM} \end{bmatrix} \times 1$ |       |    |
| Conv4_x      | $\begin{bmatrix} 3 \times 3,256 \\ 3 \times 3,256 \\ \text{CBAM} \end{bmatrix} \times 3$ |              |      | $\begin{bmatrix} 3 \times 3,64 \\ 3 \times 3,64 \\ \text{CBAM} \end{bmatrix} \times 1$ |       |    |
| Conv5_x      | $\begin{bmatrix} 3 \times 3,512 \\ 3 \times 3,512 \\ \text{CBAM} \end{bmatrix} \times 3$ |              |      |                                                                                        |       |    |
| Average pool |                                                                                          |              |      |                                                                                        |       |    |

**Supplementary Material S2.** The detailed structures of CNN A and CNN B. And the network structure can also be accessed at the following link:  
<https://github.com/1057813680/modeling-chart/blob/main/FPMMM-34.png>;  
<https://github.com/1057813680/modeling-chart/blob/main/FPMMM-8.png>

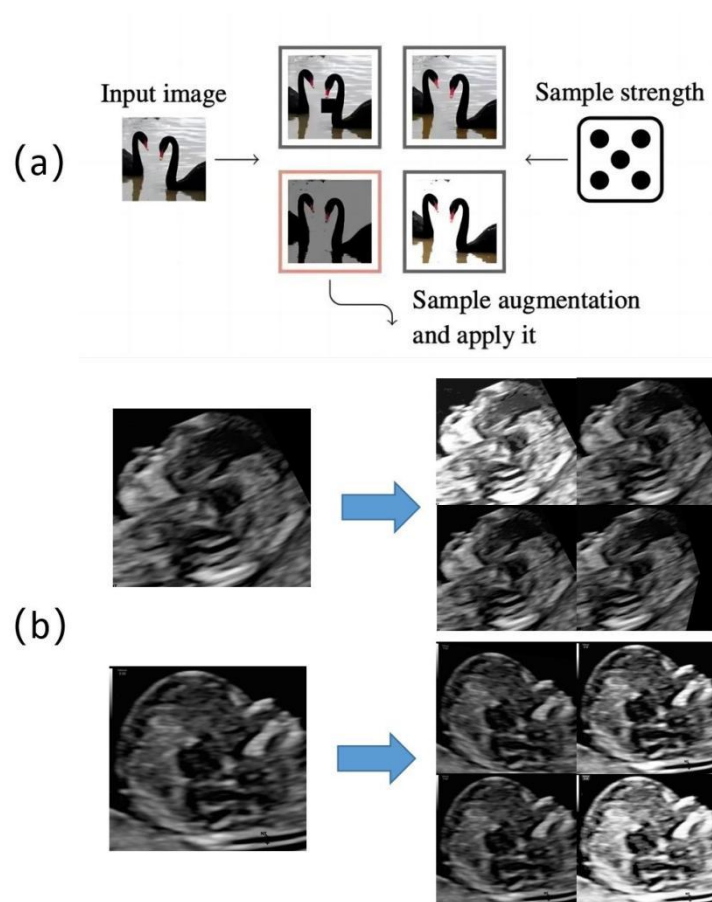

**Supplementary Material S3.** Example of Trivial Augment.
